# Supplementary material for: Hydrogen-bond-assisted isotactic-specific radical polymerization of N-vinyl-2-pyrrolidone with tartrate additives in toluene at low temperatures: high-resolution 1H NMR analysis
Source: Royal Society of Chemistry journal article supplement (doi:10.1039/c4ra08743g), 2014-01-01
Supplement: c4ra08743g1.pdf [file c4ra08743g1.pdf]

**Hydrogen-bond-assisted isotactic-specific radical polymerization of *N*-vinyl-2-pyrrolidone with tartrate additives in toluene at low temperatures: high-resolution  $^1\text{H}$  NMR analysis**

Tomohiro Hirano\*, Yuya Miyamoto, Shinya Amano, Kazuya Tatsumi, Takuya Anmoto, Hiroshi Kimura, Ken Yoshida, Miyuki Oshimura, and Koichi Ute

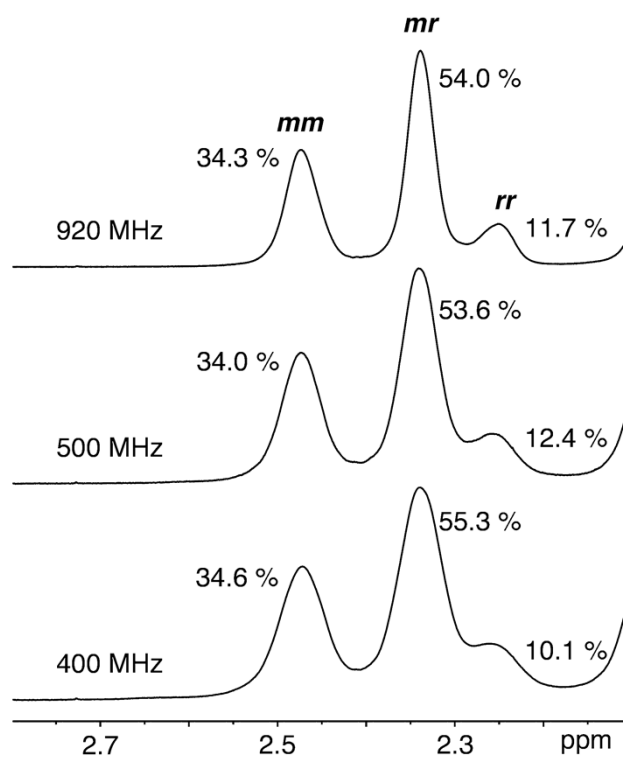

**Fig. S1**  $^1\text{H}$  NMR spectra of the  $\text{CH}_2\text{C}=\text{O}$  of PVP measured at different magnetic field strengths.

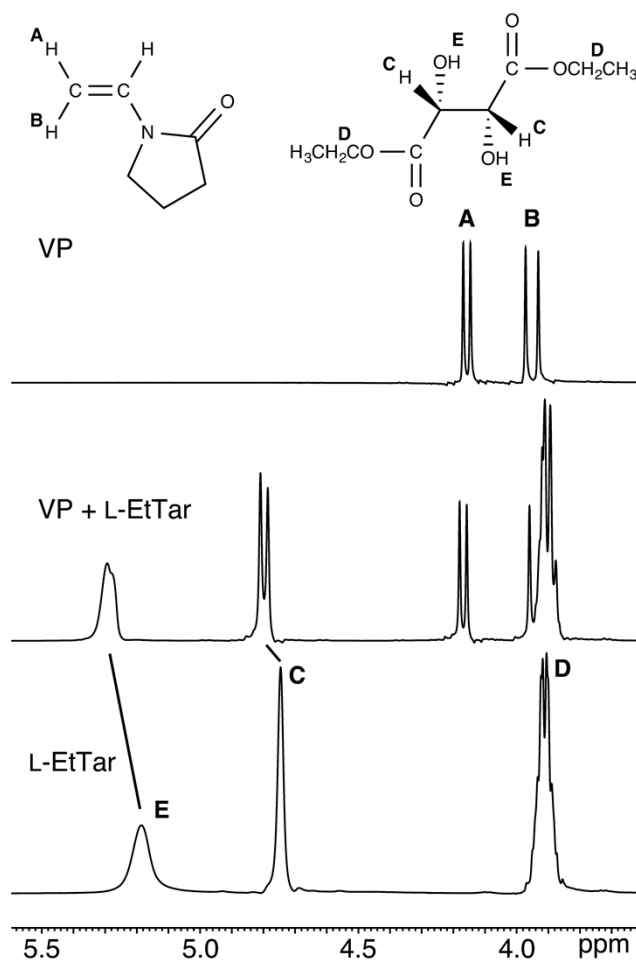

**Fig. S2** 400 MHz <sup>1</sup>H NMR spectra of VP (0.1 mol/L), L-EtTar (0.1 mol/L) and an equimolar mixture of the two components (0.1 mol/L for each) in toluene-*d*<sub>8</sub> at -60 °C.

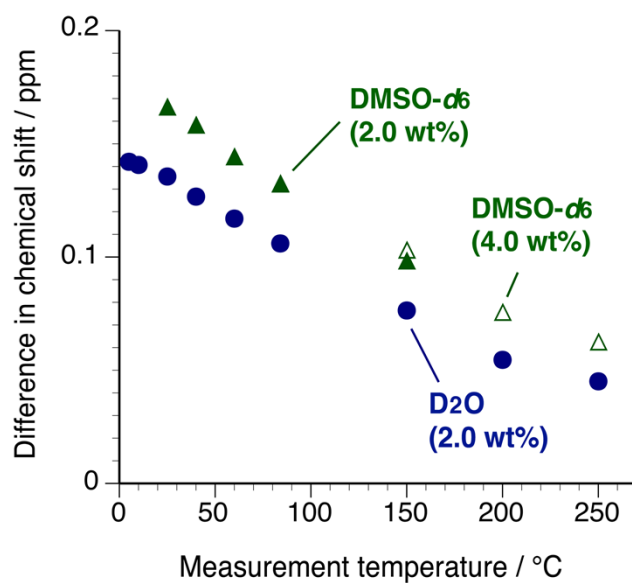

**Fig. S3.** Temperature dependence of the chemical shift difference between the peaks assignable to the *mm* and *mr* triads in the signals of the  $\text{CH}_2\text{C}=\text{O}$  groups of the PVPs (Table 1, run 6) measured in  $\text{D}_2\text{O}$  and  $\text{DMSO-}d_6$ . The chemical shift difference arising from the polymer concentration (2.0 and 4.0 wt% in  $\text{DMSO-}d_6$ ) was one order of magnitude smaller than that arising from the difference in solvent species (in  $\text{DMSO-}d_6$  and  $\text{D}_2\text{O}$  at the fixed polymer concentration of 2.0 wt%).

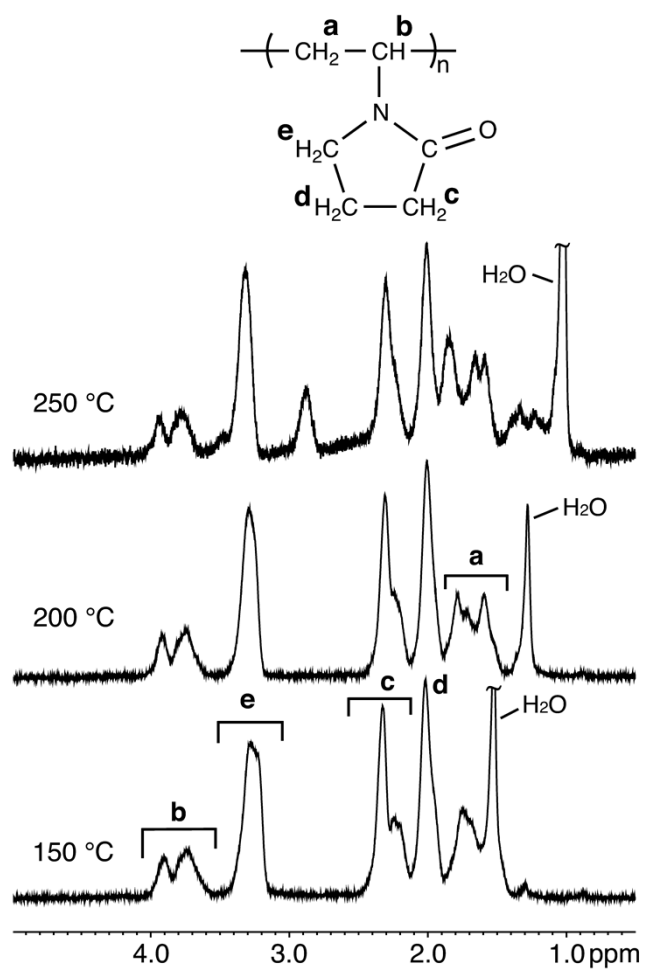

**Fig. S4.** 500 MHz <sup>1</sup>H NMR spectra of PVP in CDCl<sub>3</sub> at temperature in the range of 150–250 °C (Table 1, run 6, 4.0 wt%).

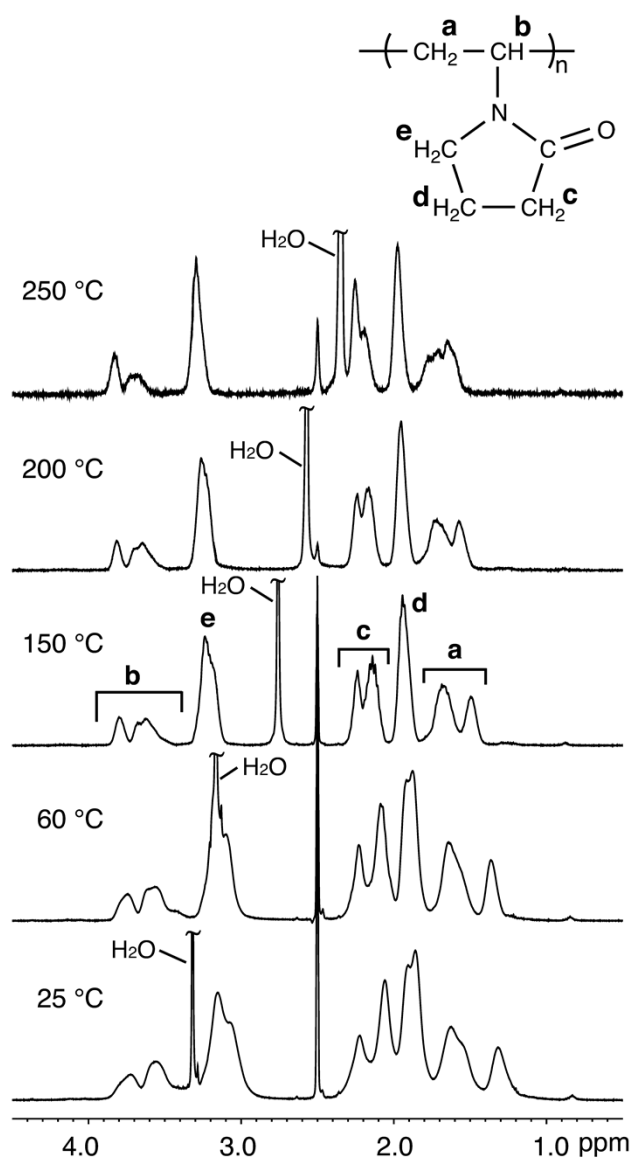

**Fig. S5.** 500 MHz  $^1\text{H}$  NMR spectra of PVP in  $\text{DMSO-}d_6$  at temperature in the range of 25–250 °C (Table 1, run 6).

The spectra at 25–150 °C (2.0 wt%) and 200–250 °C (4.0 wt%) were recorded using standard and high-temperature probes, respectively.

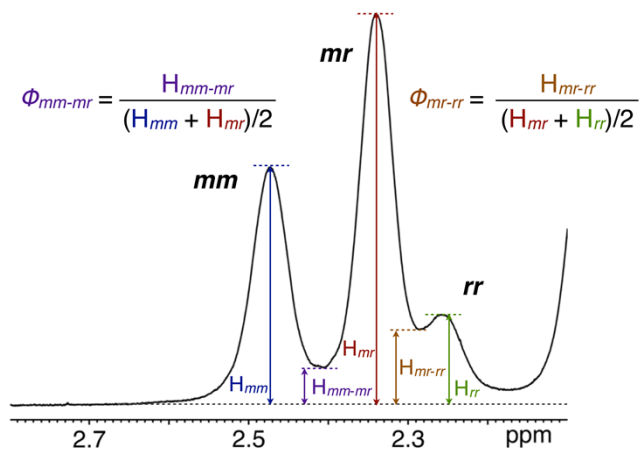

**Fig. S6.** Definition of the  $\Phi_{mm-mr}$  and  $\Phi_{mr-rr}$  values.

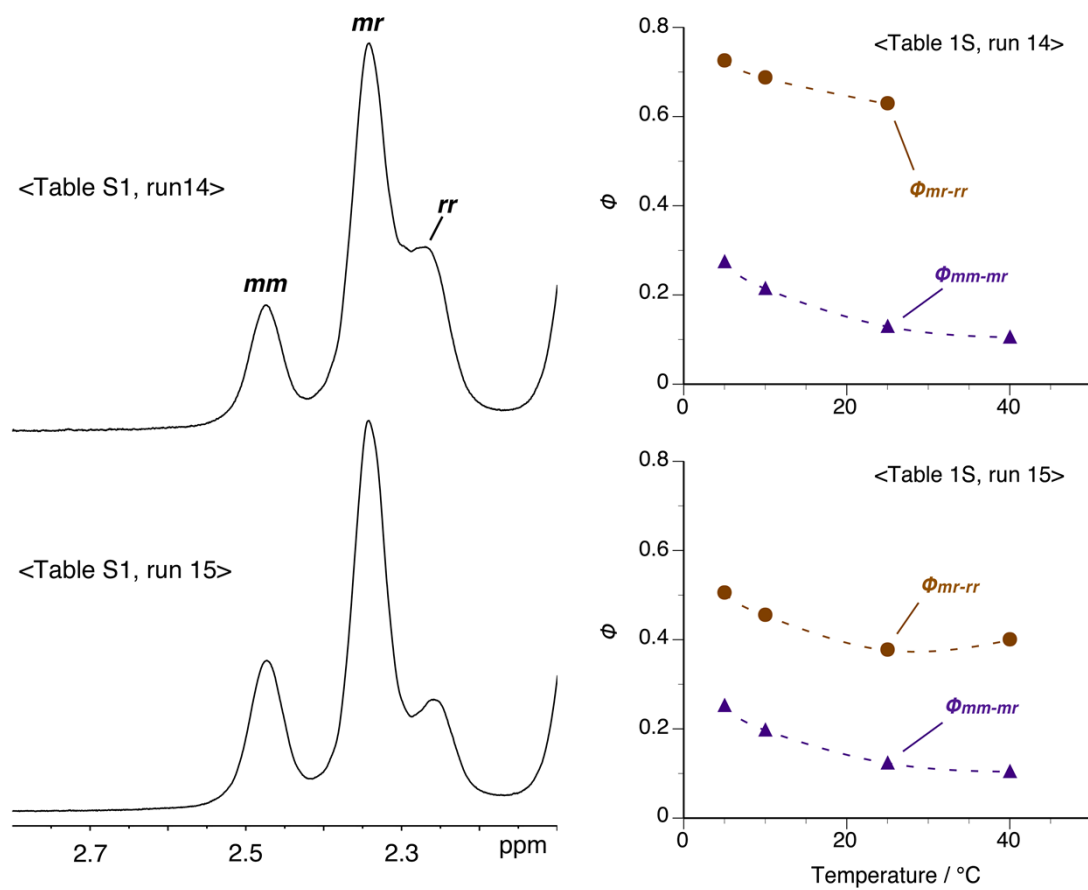

**Fig. S7.** 500 MHz  $^1\text{H}$  NMR spectra of the  $\text{CH}_2\text{C}=\text{O}$  of PVPs (Table S1, runs 14 & 15) measured in  $\text{D}_2\text{O}$  at 25  $^\circ\text{C}$ , and temperature dependence of the  $\Phi_{mm-mr}$  and  $\Phi_{mr-rr}$ .

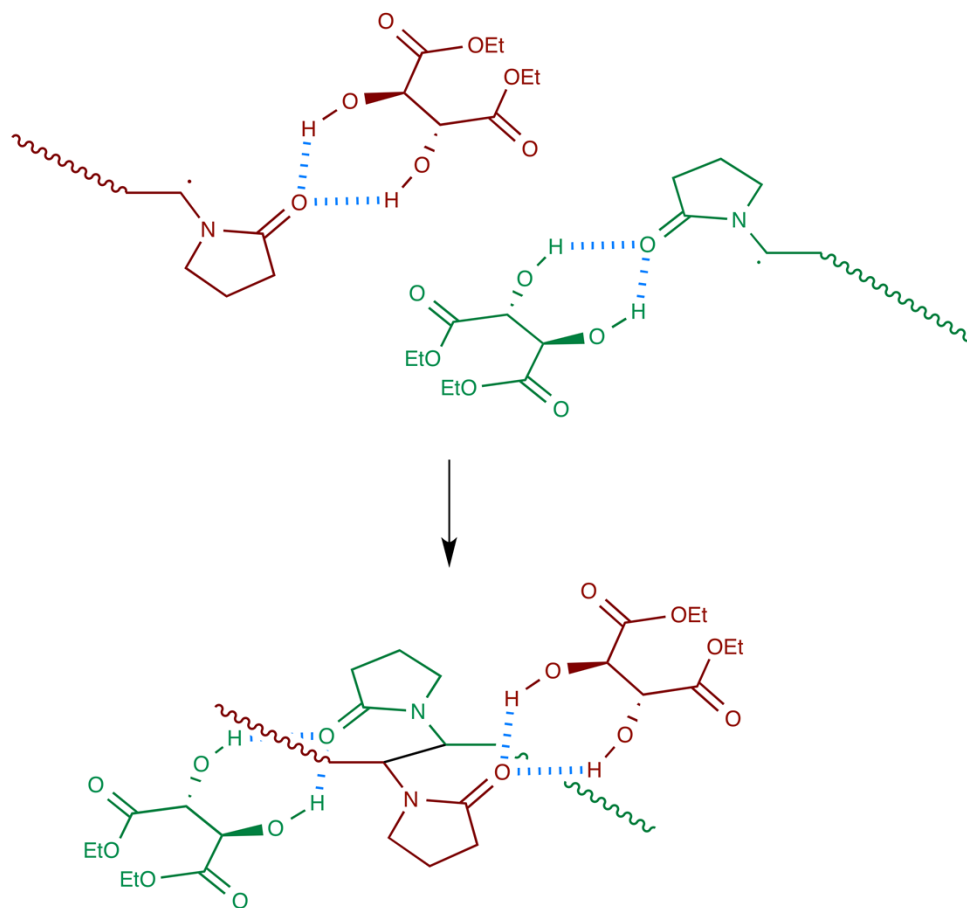

**Scheme S1.** Proposed configuration for the two polymers during the termination reaction with their propagating ends complexed with L-EtTar.



**Table S1.** Radical polymerization of VP in water or (CF<sub>3</sub>)<sub>3</sub>COH at low temperatures for 24 h, average lengths of *m* diad ( $\bar{m}$ ) of the polymers obtained and first order Markovian parameters for the polymerizations.<sup>a</sup>

| Run | $\frac{[VP]_0}{\text{mol L}^{-1}}$ | Solvent                             | Temp.<br>°C | Yield<br>% | $M_n \times 10^{-3b}$ | $M_w / M_n^b$ | Triad tacticity <sup>c</sup> / % |          |          | $\bar{m}^d$ | Markovian Parameters |             |                     |
|-----|------------------------------------|-------------------------------------|-------------|------------|-----------------------|---------------|----------------------------------|----------|----------|-------------|----------------------|-------------|---------------------|
|     |                                    |                                     |             |            |                       |               | $f_{mm}$                         | $f_{mr}$ | $f_{rr}$ |             | $P_{m/r}^e$          | $P_{r/m}^f$ | $P_{m/r} + P_{r/m}$ |
| 14  | 2.0                                | water                               | 0           | 63         | 52.8                  | 8.6           | 14.4                             | 57.4     | 28.2     | 1.50        | 0.666                | 0.504       | 1.170               |
| 15  | 9.4                                | (CF <sub>3</sub> ) <sub>3</sub> COH | -40         | 13         | 14.5                  | 2.8           | 22.5                             | 61.6     | 15.9     | 1.70        | 0.578                | 0.660       | 1.238               |

<sup>a</sup>  $[n\text{-Bu}_3\text{B}]_0 = 0.05 \text{ mol L}^{-1}$ . <sup>b</sup> Determined by SEC. <sup>c</sup> Determined by <sup>1</sup>H NMR. <sup>d</sup>  $\bar{m} = (f_{mm} + f_{mr}/2) / (f_{mr}/2)$ . <sup>e</sup>  $P_{m/r} = (f_{mr}/2) / (f_{mm} + f_{mr}/2)$ .

<sup>f</sup>  $P_{r/m} = (f_{mr}/2) / (f_{rr} + f_{mr}/2)$ .
